# Supplementary material for: Obsessive-compulsive disorder and attention-deficit/hyperactivity disorder: distinct associations with DNA methylation and genetic variation
Source: PubMed Central journal article supplement (PMC7429807; doi:10.1186/s11689-020-09324-3), 2020-08-16

### All samples

### Subset of cases (SWAN $\geq 6$ or CY-BOCS $\geq 18$ )

OCD vs. controls

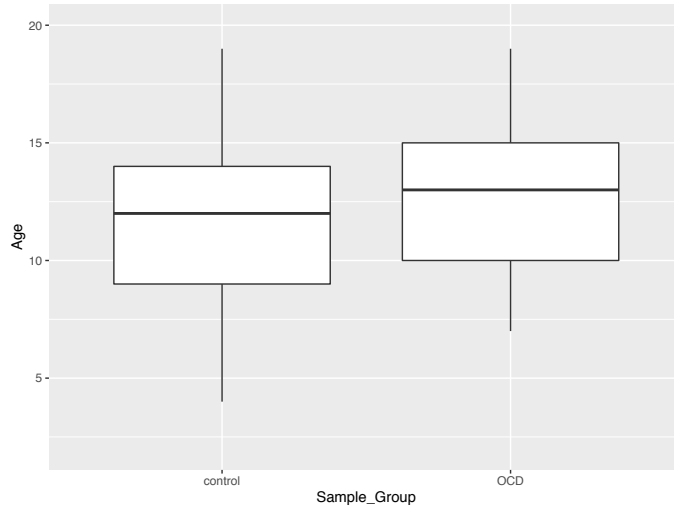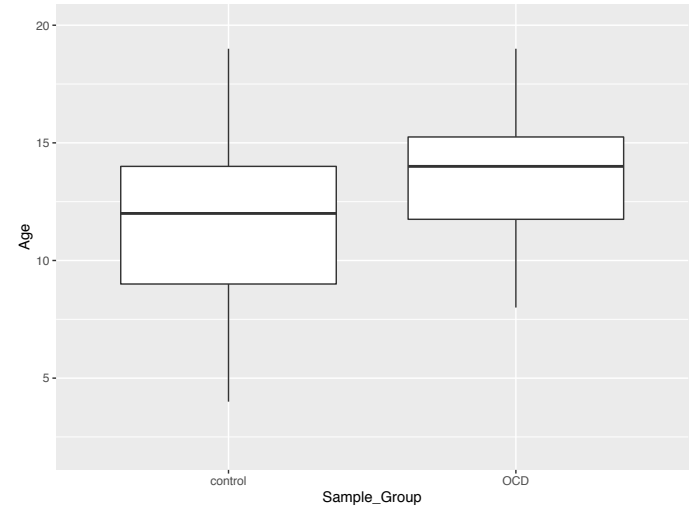

ADHD vs. controls

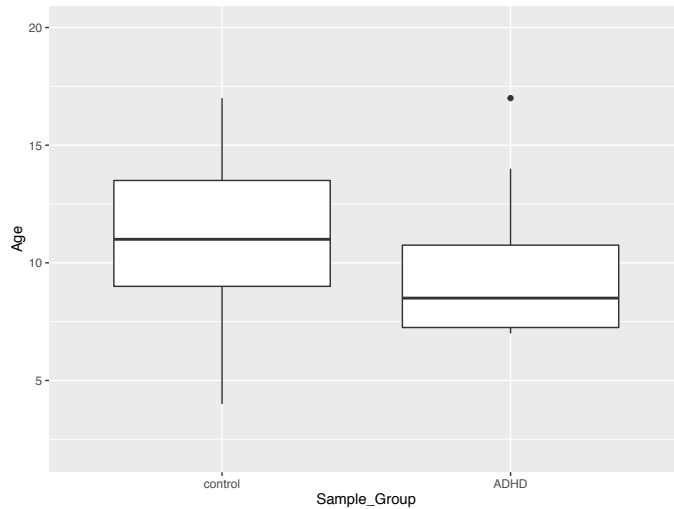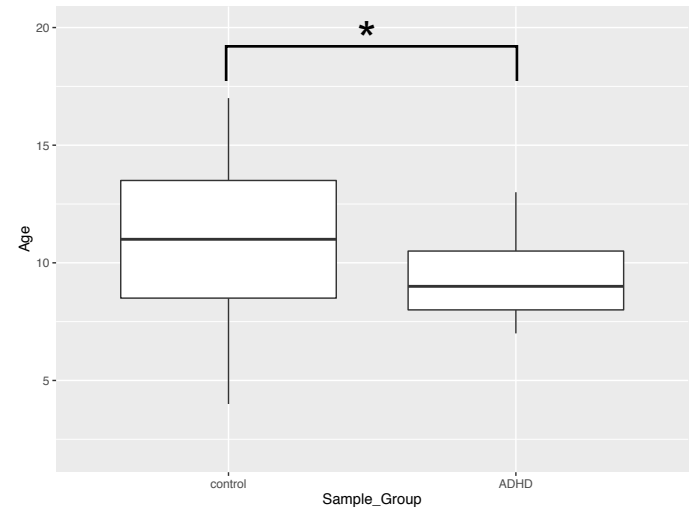

Supplement: 11689_2020_9324_MOESM3_ESM.pdf [file 11689_2020_9324_MOESM3_ESM.pdf]
